# Supplementary material for: Geographic and Specialty-Specific Disparities in Physicians’ Legal Compliance: A National-Scale Assessment of Romanian Medical Practice
Source: MDPI journal article supplement (doi:10.3390/healthcare11040499), 2023-02-08
Supplement: s1 [file s1]

Appendix B – Detailed results

Results General Practitioners

| Region       | Total | 1   |       | 2   |       | 3   |       | 4    |       | 5   |       | 6    |       | 7   |       | 9   |       | 10   |       | 11  |       | 12  |       |
|--------------|-------|-----|-------|-----|-------|-----|-------|------|-------|-----|-------|------|-------|-----|-------|-----|-------|------|-------|-----|-------|-----|-------|
|              |       | No  | %     | No  | %     | No  | %     | No   | %     | No  | %     | No   | %     | No  | %     | No  | %     | No   | %     | No  | %     | No  | %     |
| Bucuresti lf | 180   | 81  | 45,00 | 78  | 43,33 | 63  | 35,00 | 129  | 71,67 | 39  | 21,67 | 173  | 96,11 | 77  | 42,78 | 77  | 42,78 | 136  | 75,56 | 85  | 47,22 | 35  | 19,44 |
| Centru       | 164   | 71  | 43,29 | 55  | 33,54 | 93  | 56,71 | 124  | 75,61 | 34  | 20,73 | 157  | 95,73 | 61  | 37,20 | 85  | 51,83 | 124  | 75,61 | 57  | 34,76 | 24  | 14,63 |
| NE           | 182   | 63  | 34,62 | 47  | 25,82 | 100 | 54,95 | 120  | 65,93 | 42  | 23,08 | 152  | 83,52 | 127 | 69,78 | 39  | 21,43 | 111  | 60,99 | 53  | 29,12 | 36  | 19,78 |
| NV           | 192   | 82  | 42,71 | 71  | 36,98 | 83  | 43,23 | 133  | 69,27 | 34  | 17,71 | 182  | 94,79 | 75  | 39,06 | 92  | 47,92 | 153  | 79,69 | 79  | 41,15 | 28  | 14,58 |
| Sud          | 296   | 107 | 36,15 | 111 | 37,50 | 127 | 42,91 | 204  | 68,92 | 45  | 15,20 | 280  | 94,59 | 138 | 46,62 | 124 | 41,89 | 223  | 75,34 | 91  | 30,74 | 61  | 20,61 |
| SE           | 216   | 109 | 50,46 | 93  | 43,06 | 110 | 50,93 | 145  | 67,13 | 56  | 25,93 | 206  | 95,37 | 95  | 43,98 | 102 | 47,22 | 150  | 69,44 | 73  | 33,80 | 36  | 16,67 |
| SV           | 162   | 87  | 53,70 | 78  | 48,15 | 75  | 46,30 | 96   | 59,26 | 23  | 14,20 | 151  | 93,21 | 65  | 40,12 | 78  | 48,15 | 117  | 72,22 | 44  | 27,16 | 28  | 17,28 |
| Vest         | 168   | 86  | 51,19 | 64  | 38,10 | 95  | 56,55 | 115  | 68,45 | 27  | 16,07 | 165  | 98,21 | 70  | 41,67 | 84  | 50,00 | 121  | 72,02 | 61  | 36,31 | 42  | 25,00 |
| TOTAL        | 1560  | 686 | 43,97 | 597 | 38,27 | 746 | 47,82 | 1066 | 68,33 | 300 | 43,73 | 1466 | 93,97 | 708 | 45,38 | 681 | 43,65 | 1135 | 72,76 | 543 | 34,81 | 290 | 18,59 |

Self-assessment

| Region       | 1   |       |     |       |                                   |       |       | 2   |       |     |       |                                   |       |       | 3   |       |      |       |       | 4    |       |    |       |
|--------------|-----|-------|-----|-------|-----------------------------------|-------|-------|-----|-------|-----|-------|-----------------------------------|-------|-------|-----|-------|------|-------|-------|------|-------|----|-------|
|              | Yes | %     | No  | %     | There is none/I cannot appreciate | %     | Total | Da  | %     | No  | %     | There is none/I cannot appreciate | %     | Total | Yes | %     | No   | %     | Total | Yes  | %     | No | %     |
| Bucuresti lf | 108 | 64,29 | 26  | 15,48 | 34                                | 20,24 | 168   | 13  | 7,83  | 74  | 44,58 | 79                                | 47,59 | 166   | 14  | 7,53  | 172  | 92,47 | 186   | 162  | 87,10 | 24 | 12,90 |
| Centru       | 116 | 70,73 | 32  | 19,51 | 16                                | 9,76  | 164   | 14  | 8,43  | 75  | 45,18 | 77                                | 46,39 | 166   | 9   | 5,49  | 155  | 94,51 | 164   | 158  | 96,34 | 6  | 3,66  |
| NE           | 114 | 65,52 | 29  | 16,67 | 31                                | 17,82 | 174   | 18  | 10,78 | 71  | 42,51 | 78                                | 46,71 | 167   | 34  | 19,54 | 140  | 80,46 | 174   | 162  | 93,10 | 12 | 6,90  |
| NV           | 131 | 65,83 | 41  | 20,60 | 27                                | 13,57 | 199   | 18  | 8,82  | 74  | 36,27 | 112                               | 54,90 | 204   | 12  | 5,88  | 192  | 94,12 | 204   | 192  | 94,58 | 11 | 5,42  |
| Sud          | 181 | 61,15 | 73  | 24,66 | 42                                | 14,19 | 296   | 23  | 7,77  | 126 | 42,57 | 147                               | 49,66 | 296   | 21  | 6,60  | 297  | 93,40 | 318   | 301  | 94,95 | 16 | 5,05  |
| SE           | 119 | 55,35 | 71  | 33,02 | 25                                | 11,63 | 215   | 27  | 12,56 | 79  | 36,74 | 109                               | 50,70 | 215   | 24  | 11,32 | 188  | 88,68 | 212   | 207  | 96,28 | 8  | 3,72  |
| SV           | 78  | 56,93 | 28  | 20,44 | 31                                | 22,63 | 137   | 15  | 9,38  | 78  | 48,75 | 67                                | 41,88 | 160   | 17  | 10,63 | 143  | 89,38 | 160   | 148  | 92,50 | 12 | 7,50  |
| Vest         | 115 | 68,45 | 33  | 19,64 | 20                                | 11,90 | 168   | 7   | 4,17  | 80  | 47,62 | 81                                | 48,21 | 168   | 7   | 4,17  | 161  | 95,83 | 168   | 161  | 95,83 | 7  | 4,17  |
| TOTAL        | 962 | 63,25 | 333 | 21,89 | 226                               | 14,86 | 1521  | 135 | 8,75  | 657 | 42,61 | 750                               | 48,64 | 1542  | 138 | 8,70  | 1448 | 91,30 | 1586  | 1491 | 93,95 | 96 | 6,05  |

## Attending Physicians

| Region       | Total | 1   |       | 2   |       | 3   |       | 4   |       | 5   |       | 6    |       | 7    |       | 9   |       | 10  |       | 11  |       | 12  |       |
|--------------|-------|-----|-------|-----|-------|-----|-------|-----|-------|-----|-------|------|-------|------|-------|-----|-------|-----|-------|-----|-------|-----|-------|
|              |       | No  | %     | No   | %     | No   | %     | No  | %     | No  | %     | No  | %     | No  | %     |
| Bucuresti lf | 305   | 97  | 31,80 | 67  | 21,97 | 122 | 40,00 | 181 | 59,34 | 57  | 18,69 | 286  | 93,77 | 251  | 82,30 | 60  | 19,67 | 206 | 67,54 | 109 | 35,74 | 70  | 22,95 |
| Centru       | 130   | 40  | 30,77 | 24  | 18,46 | 64  | 49,23 | 93  | 71,54 | 22  | 16,92 | 129  | 99,23 | 105  | 80,77 | 29  | 22,31 | 83  | 63,85 | 46  | 35,38 | 28  | 21,54 |
| NE           | 188   | 61  | 32,45 | 37  | 19,68 | 105 | 55,85 | 114 | 60,64 | 40  | 21,28 | 179  | 95,21 | 151  | 80,32 | 21  | 11,17 | 124 | 65,96 | 62  | 32,98 | 36  | 19,15 |
| NV           | 178   | 55  | 30,90 | 32  | 17,98 | 72  | 40,45 | 97  | 54,49 | 53  | 29,78 | 172  | 96,63 | 151  | 84,83 | 41  | 23,03 | 116 | 65,17 | 62  | 34,83 | 37  | 20,79 |
| Sud          | 207   | 58  | 28,02 | 31  | 14,98 | 98  | 47,34 | 121 | 58,45 | 45  | 21,74 | 194  | 93,72 | 158  | 76,33 | 56  | 27,05 | 126 | 60,87 | 68  | 32,85 | 49  | 23,67 |
| SE           | 165   | 47  | 28,48 | 29  | 17,58 | 98  | 59,39 | 92  | 55,76 | 48  | 29,09 | 159  | 96,36 | 139  | 84,24 | 36  | 21,82 | 100 | 60,61 | 48  | 29,09 | 43  | 26,06 |
| SV           | 74    | 21  | 28,38 | 18  | 24,32 | 35  | 47,30 | 46  | 62,16 | 13  | 17,57 | 72   | 97,30 | 61   | 82,43 | 17  | 22,97 | 38  | 51,35 | 26  | 35,14 | 19  | 25,68 |
| Vest         | 144   | 37  | 25,69 | 23  | 15,97 | 74  | 51,39 | 90  | 62,50 | 29  | 20,14 | 139  | 96,53 | 129  | 89,58 | 30  | 20,83 | 93  | 64,58 | 53  | 36,81 | 39  | 27,08 |
| TOTAL        | 1391  | 416 | 29,91 | 261 | 18,76 | 668 | 48,02 | 834 | 59,96 | 307 | 73,80 | 1330 | 95,61 | 1145 | 82,31 | 290 | 20,85 | 886 | 63,70 | 474 | 34,08 | 321 | 23,08 |

## Self-assessment

| Region       | 1   |       |     |       |                                   |       |       | 2   |       |     |       |                                   |       |       | 3   |       |      |       |       |      |       | 4  |       |  |  |  |
|--------------|-----|-------|-----|-------|-----------------------------------|-------|-------|-----|-------|-----|-------|-----------------------------------|-------|-------|-----|-------|------|-------|-------|------|-------|----|-------|--|--|--|
|              |     |       |     |       | There is none/I cannot appreciate |       | Total |     |       |     |       | There is none/I cannot appreciate |       | Total |     |       |      |       | Total |      |       |    |       |  |  |  |
|              | Yes |       | No  |       |                                   |       |       | Yes |       | No  |       |                                   |       |       | Yes |       | No   |       | Total | Yes  |       | No |       |  |  |  |
| Bucuresti lf | 151 | 52,80 | 81  | 28,32 | 54                                | 18,88 | 286   | 37  | 12,67 | 125 | 42,81 | 130                               | 44,52 | 292   | 69  | 22,70 | 235  | 77,30 | 304   | 292  | 96,37 | 11 | 3,63  |  |  |  |
| Centru       | 81  | 64,80 | 18  | 14,40 | 26                                | 20,80 | 125   | 22  | 17,74 | 50  | 40,32 | 52                                | 41,94 | 124   | 24  | 18,60 | 105  | 81,40 | 129   | 121  | 93,80 | 8  | 6,20  |  |  |  |
| NE           | 103 | 66,03 | 31  | 19,87 | 22                                | 14,10 | 156   | 22  | 14,10 | 75  | 48,08 | 59                                | 37,82 | 156   | 46  | 28,40 | 116  | 71,60 | 162   | 155  | 95,68 | 7  | 4,32  |  |  |  |
| NV           | 130 | 62,50 | 48  | 23,08 | 30                                | 14,42 | 208   | 23  | 10,90 | 100 | 47,39 | 88                                | 41,71 | 211   | 52  | 24,41 | 161  | 75,59 | 213   | 192  | 89,30 | 23 | 10,70 |  |  |  |
| Sud          | 120 | 60,91 | 48  | 24,37 | 29                                | 14,72 | 197   | 31  | 15,35 | 97  | 48,02 | 74                                | 36,63 | 202   | 76  | 37,81 | 125  | 62,19 | 201   | 193  | 94,15 | 12 | 5,85  |  |  |  |
| SE           | 99  | 55,62 | 48  | 26,97 | 31                                | 17,42 | 178   | 24  | 13,56 | 71  | 40,11 | 82                                | 46,33 | 177   | 58  | 32,40 | 121  | 67,60 | 179   | 168  | 92,82 | 13 | 7,18  |  |  |  |
| SV           | 48  | 55,81 | 22  | 25,58 | 16                                | 18,60 | 86    | 8   | 9,20  | 42  | 48,28 | 37                                | 42,53 | 87    | 32  | 34,78 | 60   | 65,22 | 92    | 86   | 93,48 | 6  | 6,52  |  |  |  |
| Vest         | 93  | 58,86 | 31  | 19,62 | 34                                | 21,52 | 158   | 27  | 16,27 | 83  | 50,00 | 56                                | 33,73 | 166   | 41  | 24,40 | 127  | 75,60 | 168   | 161  | 96,41 | 6  | 3,59  |  |  |  |
| TOTAL        | 825 | 59,18 | 327 | 23,46 | 242                               | 17,36 | 1394  | 194 | 13,71 | 643 | 45,44 | 578                               | 40,85 | 1415  | 398 | 27,49 | 1050 | 72,51 | 1448  | 1368 | 94,09 | 86 | 5,91  |  |  |  |
