# Supplementary material for: Geographic and Specialty-Specific Disparities in Physicians’ Legal Compliance: A National-Scale Assessment of Romanian Medical Practice
Source: MDPI journal article supplement (doi:10.3390/healthcare11040499), 2023-02-08
Supplement: s1 [file s1]

## Questionnaire to assess malpractice risks

1. Is information about the health condition of a fully capable patient disclosed to third parties?
  - a. Yes, but only to close relatives
  - b. No
  - c. Yes, with the express patient's permission
2. Is information about a patient's treatment disclosed to third parties?
  - a. Yes, to NGOs that support patients' rights
  - b. Yes, to the patient's family members
  - c. No.
3. In a media-interested case, do you allow press access to the patient?
  - a. Yes, with express patient's permission.
  - b. Yes, the public needs to be informed
  - c. No
4. Between two patients with similar medical conditions, which one do you prioritize?
  - a. The youngest patient
  - b. The Romanian patient
  - c. The patient with a higher economic status
5. Human biological samples are collected and analyzed:
  - a. According to medical decision
  - b. After obtaining the patient's informed consent.
  - c. After consulting with institutional management, according to medical and financial criteria
6. You will perform a potentially risky maneuver on the patient. Do you inform the patient about the risks?
  - a. Yes, always in the detail
  - b. No, to protect him
  - c. No, the decision is a medical one
7. Do you obtain a patient's written consent for performing a risky maneuver?
  - a. No, the decision belongs to the doctor
  - b. Yes, always
  - c. Only when the risk is high
9. How do you proceed when a patient requires medical intervention beyond your competency?
  - a. I do not intervene no matter the patient's status
  - b. I offer medical support after consulting with a competent physician
  - c. I offer treatment in case of an emergency.
10. The patient requests a second opinion from a physician outside of the hospital unit. What do you do?
  - a. I assist in receiving a second medical opinion.
  - b. I recommend the patient get transferred to the hospital where the other physician practices
  - c. I explain to the patient that he is under my care.
11. Are medical data regarding investigations, diagnosis, and treatment fully disclosed to the patient?

- a. It is not necessary; we explain to the patient the treatment and the necessity to come back for future evaluations
  - b. Yes, always, completely.
  - c. The patient receives only information on the treatment and diagnostic
12. Patient cannot express his consent and his health request immediate intervention. The patient-informed consent form is replaced by:
- a. In an emergency, the patient's consent is not necessary
  - b. A physician's written report later added to the patient's medical file.
  - c. A medical committee takes the decision.
13. Are you aware of the medical unit's internal protocols?
- a. Yes
  - b. No
  - c. There is no regulation.
14. In the past three years, have you performed any medical act that could be deemed malpractice?
- a. Yes
  - b. No
  - c. I can't tell
15. Has a patient filed a complaint against you alleging malpractice?
- a. Yes
  - b. No
16. Do you view patients' accusations of medical malpractice as a serious and present threat?
- a. Yes
  - b. No
